# Supplementary material
Source: PubMed Central journal article supplement (PMC6357332)
Supplement: ajtr0011-0290-f8.pdf [file ajtr0011-0290-f8.pdf]

NORAD promoted thyroid carcinoma progression through targeting miR-202-5p

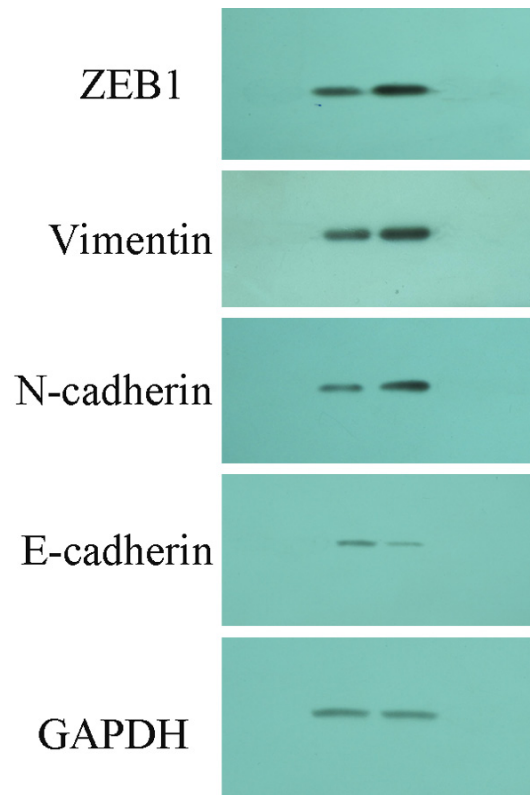

**Figure S1.** The protein expression of ZEB1, vimentin, N-cadherin and E-cadherin was measured by western blotting.
